# Supplementary material for: Liver Fat and Cardiometabolic Risk Factors Among School‐Age Children
Source: PubMed Central journal article supplement — Hepatology. 2020 Apr 8;72(1):119–29. doi: 10.1002/hep.31018 (PMC7496381; doi:10.1002/hep.31018), 2020-04-08
Supplement: HEP-72-119-s001.pdf [file HEP-72-119-s001.pdf]

## Supplemental Material

### Liver fat and Cardio-metabolic Risk Factors among School Age Children

Madelon L. Geurtsen, MD, Susana Santos, PhD, Janine F. Felix, MD, PhD,  
Liesbeth Duijts, MD, PhD, Meike W. Vernooij, MD, PhD, Romy Gaillard, MD, PhD,  
Vincent W.V. Jaddoe, MD, PhD

---

#### Table of Contents

---

- Table 1.** Comparison of Child Characteristics between Children Included and Not Included in the Analyses
- Table 2.** Associations of Liver Fat Fraction and Non-alcoholic Fatty Liver Disease with Insulin, Glucose, HDL-cholesterol and LDL-cholesterol
- Table 3.** Associations of Liver Fat Fraction and Non-alcoholic Fatty Liver Disease with Cardio-metabolic Risk Factors at School Age among Normal Weight and Overweight/Obese Children
- Table 4.** Associations of Liver Fat Fraction and Non-alcoholic Fatty Liver Disease with Cardio-metabolic Risk Factors at School Age
- Table 5.** Associations of Liver Fat Fraction with Odds of Clustering of Cardio-metabolic Risk Factors without Visceral Fat Mass – Confounder Models
- Figure 1.** Study Participants Flow Chart
- Figure 2.** Associations of Liver Fat Fraction and Non-alcoholic Fatty Liver Disease with Cardio-metabolic Risk Factors at School Age – Basic Models
- Figure 3.** Associations of Liver Fat Fraction and Non-alcoholic Fatty Liver Disease with Cardio-metabolic Risk Factors at School Age – Body Mass Index Models
- Figure 4.** Histogram of Liver Fat Fraction of Children with Cardio-metabolic Clustering
- Figure 5.** Histogram of Liver Fat Fraction of Children without Cardio-metabolic Clustering
- Figure 6.** Associations of Liver Fat Fraction and Non-alcoholic Fatty Liver Disease with Odds of Adverse Levels of Single and Clustered Cardio-metabolic Risk Factors at School Age – Basic Models
- Figure 7.** Associations of Liver Fat Fraction and Non-alcoholic Fatty Liver Disease with Odds of Cardio-metabolic Risk Factors at School Age – Confounder Models

**Figure 8.** Associations of Liver Fat Fraction and Non-alcoholic Fatty Liver Disease with Odds of Adverse Levels of Single and Clustered Cardio-metabolic Risk Factors at School Age – Body Mass Index Models

---

**Table 1.** Comparison of Child Characteristics between Children Included and Not Included in the Analyses

| Characteristics                               | Participants<br>(n = 3,170) | Non-participants<br>(n = 965) | P-value |
|-----------------------------------------------|-----------------------------|-------------------------------|---------|
| Age, mean (SD), years                         | 9.8 (0.3)                   | 9.8 (0.4)                     | 0.100   |
| Boys, n (%)                                   | 1563 (49.3)                 | 505 (52.3)                    | 0.100   |
| Ethnicity, n (%), European                    | 2118 (68.2)                 | 576 (61.2)                    | <0.001  |
| Birth weight, mean (SD), g                    | 3446 (558)                  | 3409 (531)                    | 0.328   |
| Body mass index, mean (SD), kg/m <sup>2</sup> | 17.5 (2.7)                  | 17.8 (3.0)                    | 0.011   |
| Systolic blood pressure, mean (SD), mmHg      | 103.3 (8.0)                 | 103.3 (8.1)                   | 0.489   |
| Diastolic blood pressure, mean (SD), mmHg     | 58.6 (6.4)                  | 58.8 (6.6)                    | 0.611   |
| Insulin, median (95% range), pmol/l           | 182.3 (35.2, 629.1)         | 174.3 (35.8, 740.4)           | 0.605   |
| Glucose, mean (SD), mmol/l                    | 5.3 (0.9)                   | 5.2 (1.0)                     | 0.044   |
| HOMA-IR, median (95% range)                   | 7.0 (1.1, 28.8)             | 6.7 (1.1, 32.4)               | 0.340   |
| Total – cholesterol, mean (SD), mmol/l        | 4.3 (0.7)                   | 4.3 (0.6)                     | 0.378   |
| HDL – cholesterol, mean (SD), mmol/l          | 1.5 (0.3)                   | 1.5 (0.3)                     | 0.524   |
| LDL – cholesterol, mean (SD), mmol/l          | 2.3 (0.6)                   | 2.3 (0.6)                     | 0.417   |
| Triglycerides, median (95% range), mmol/l     | 1.0 (0.4, 2.6)              | 1.0 (0.4, 2.4)                | 0.418   |
| C-reactive protein, median (95% range), mg/l  | 0.3 (0.3, 5.7)              | 0.3 (0.3, 5.1)                | 0.279   |

Values are observed data and represent means (SD), medians (95% range) or numbers of subjects (valid %). Differences were tested using Student's t-tests and Mann-Whitney tests for normally and non-normally distributed variables, respectively and using  $\chi^2$ -test for dichotomous variables. HOMA-IR was calculated using the formula: insulin resistance = (insulin ( $\mu$ U/L) x glucose (mmol/L)) / 22.5. LDL-cholesterol is calculated according to the Friedewald formula. HOMA-IR, Homeostatic Model Assessment of Insulin Resistance; n, number; SD, standard deviation.

**Table 2.** Associations of Liver Fat Fraction and Non-alcoholic Fatty Liver Disease with Insulin, Glucose, HDL-cholesterol and LDL-cholesterol

|                                          | <b>Insulin, Glucose, HDL-cholesterol and LDL-cholesterol at 10 years in Standard Deviation Scores Difference<br/>(95% Confidence Interval)</b> |                               |                                       |                                       |
|------------------------------------------|------------------------------------------------------------------------------------------------------------------------------------------------|-------------------------------|---------------------------------------|---------------------------------------|
|                                          | <b>Insulin</b><br>(n = 2,246)                                                                                                                  | <b>Glucose</b><br>(n = 2,252) | <b>HDL-cholesterol</b><br>(n = 2,253) | <b>LDL-cholesterol</b><br>(n = 2,242) |
| <b>Liver Fat Fraction</b>                |                                                                                                                                                |                               |                                       |                                       |
| Basic model                              | 0.14 (0.10;0.18)*                                                                                                                              | 0.02 (-0.02;0.07)             | -0.13 (-0.17;-0.09)*                  | 0.09 (0.04;0.13)*                     |
| Confounder model                         | 0.14 (0.09;0.18)*                                                                                                                              | 0.03 (-0.01;0.07)             | -0.11 (-0.15;-0.07)*                  | 0.09 (0.05;0.13)*                     |
| BMI model                                | 0.06 (0.02;0.11)*                                                                                                                              | 0.05 (0.01;0.10) <sup>†</sup> | -0.05 (-0.10;-0.01) <sup>†</sup>      | 0.05 (0.00;0.09) <sup>†</sup>         |
| <b>Non-alcoholic Fatty Liver Disease</b> |                                                                                                                                                |                               |                                       |                                       |
| Basic model                              | 0.41 (0.16;0.66)*                                                                                                                              | -0.04 (-0.29;0.21)            | -0.37 (-0.61;-0.12)*                  | 0.30 (0.17;0.43) <sup>†</sup>         |
| Confounder model                         | 0.38 (0.13;0.64)*                                                                                                                              | -0.03 (-0.29;0.23)            | -0.31 (-0.56;-0.06) <sup>†</sup>      | 0.31 (0.05;0.56) <sup>†</sup>         |
| BMI model                                | 0.13 (-0.12;0.38)                                                                                                                              | 0.02 (-0.24;0.28)             | -0.11 (-0.36;0.14)                    | 0.16 (-0.09;0.42)                     |

Values are regression coefficients (95% Confidence Intervals) from linear regression models that reflect differences in insulin and glucose in SDS per SDS change in childhood liver fat fraction. \*P-value <0.01,

<sup>†</sup>P-value <0.05. Associations are adjusted for child age, sex, ethnicity in the basic models, further adjusted for maternal pre-pregnancy BMI and maternal education in the confounder models and additionally adjusted for childhood BMI at ten years of age in the BMI model. N, number; SDS, standard deviation scores.

**Table 3.** Associations of Liver Fat Fraction and Non-alcoholic Fatty Liver Disease with Cardio-metabolic Risk Factors at School Age among Normal Weight and Overweight/Obese Children

|                                          | Cardio-metabolic risk factors at 10 years in Standard Deviation Scores |                                |                                 |                                |                                |                                |
|------------------------------------------|------------------------------------------------------------------------|--------------------------------|---------------------------------|--------------------------------|--------------------------------|--------------------------------|
|                                          | Difference (95% Confidence Interval)                                   |                                |                                 |                                |                                |                                |
|                                          | Systolic blood pressure                                                | Diastolic blood pressure       | HOMA-IR                         | Total – cholesterol            | Triglycerides                  | C-reactive protein             |
| <b>Liver fat fraction</b>                |                                                                        |                                |                                 |                                |                                |                                |
| Normal weight group                      | n = 2,323<br>0.09 (0.04;0.13)*                                         | n = 2,324<br>0.06 (0.01;0.11)† | n = 1,729<br>0.07 (0.01;0.13)†  | n = 1,729<br>0.07 (0.01;0.12)† | n = 1,727<br>0.15 (0.10;0.21)* | n = 1,730<br>0.07 (0.02;0.12)* |
| Overweight group                         | n = 536<br>0.13 (0.07;0.19)*                                           | n = 536<br>0.08 (0.02;0.15)†   | n = 377<br>0.14 (0.07;0.22)*    | n = 382<br>0.13 (0.05;0.21)*   | n = 380<br>0.20 (0.12;0.27)*   | n = 383<br>0.20 (0.11;0.29)*   |
| <b>Non-alcoholic Fatty Liver Disease</b> |                                                                        |                                |                                 |                                |                                |                                |
| Normal weight group                      | n = 2,323<br>0.24 (-0.15;0.62)                                         | n = 2,324<br>0.45 (0.05;0.85)† | n = 1,729<br>-0.11 (-0.55;0.32) | n = 1,729<br>0.17 (-0.27;0.60) | n = 1,727<br>0.47 (0.03;0.91)† | n = 1,730<br>0.28 (-0.11;0.67) |
| Overweight group                         | n = 536<br>0.37 (0.10;0.63)*                                           | n = 536<br>0.31 (0.04;0.58)†   | n = 377<br>0.32 (0.00;0.63)     | n = 382<br>0.45 (0.11;0.80)*   | n = 380<br>0.49 (0.17;0.81)*   | n = 383<br>0.76 (0.37;1.14)*   |

Values are regression coefficients (95% Confidence Intervals) from linear regression models that reflect differences in childhood cardio-metabolic risk factors in SDS per SDS change in childhood liver fat fraction or for children with non-alcoholic fatty liver disease as compared to the reference group (children with <5% of liver fat). \*P-value <0.01, †P-value <0.05. Associations are adjusted for child's age, sex, ethnicity, maternal pre-pregnancy BMI and maternal education. HOMA-IR, Homeostatic Model Assessment of Insulin Resistance; n, number; SDS, standard deviation scores.

**Table 4** Associations of Liver Fat Fraction and Non-alcoholic Fatty Liver Disease with Cardio-metabolic Risk Factors at School Age

|                                          | Cardio-metabolic risk factors at 10 years in Standard Deviation Scores |                          |                   |                     |                   |                    |
|------------------------------------------|------------------------------------------------------------------------|--------------------------|-------------------|---------------------|-------------------|--------------------|
|                                          | Difference (95% Confidence Interval) (n = 3,170)                       |                          |                   |                     |                   |                    |
|                                          | Systolic blood pressure                                                | Diastolic blood pressure | HOMA-IR           | Total – cholesterol | Triglycerides     | C-reactive protein |
| <b>Liver fat fraction</b>                |                                                                        |                          |                   |                     |                   |                    |
| Confounder model                         | 0.17 (0.14;0.21)*                                                      | 0.07 (0.03;0.11)*        | 0.13 (0.09;0.17)* | 0.11 (0.07;0.15)*   | 0.21 (0.17;0.25)* | 0.20 (0.16;0.24)*  |
| BMI model                                | 0.07 (0.03;0.10)*                                                      | 0.05 (0.01;0.09)*        | 0.07 (0.02;0.11)* | 0.09 (0.04;0.13)*   | 0.16 (0.12;0.21)* | 0.12 (0.08;0.16)*  |
| Visceral fat model                       | 0.07 (0.03;0.11)*                                                      | 0.05 (0.00;0.09)*        | 0.11 (0.06;0.17)* | 0.08 (0.03;0.13)*   | 0.13 (0.08;0.18)* | 0.10 (0.05;0.15)*  |
| <b>Non-alcoholic Fatty Liver Disease</b> |                                                                        |                          |                   |                     |                   |                    |
| Confounder model                         | 0.66 (0.45;0.87)*                                                      | 0.38 (0.17;0.59)*        | 0.34 (0.08;0.59)* | 0.45 (0.20;0.70)*   | 0.67 (0.42;0.93)* | 0.96 (0.71;1.21)*  |
| BMI model                                | 0.29 (0.09;0.49)*                                                      | 0.31 (0.10;0.53)*        | 0.11 (-0.14;0.37) | 0.36 (0.10;0.61)*   | 0.48 (0.23;0.74)* | 0.67 (0.42;0.91)*  |
| Visceral fat model                       | 0.20 (-0.03;0.44)                                                      | 0.25 (0.00;0.49)*        | 0.20 (-0.10;0.49) | 0.32 (0.03;0.62)*   | 0.18 (-0.11;0.47) | 0.59 (0.31;0.87)*  |

Values are regression coefficients (95% Confidence Intervals) from linear regression models that reflect differences in childhood cardio-metabolic risk factors in SDS per SDS change in childhood liver fat fraction or for children with non-alcoholic fatty liver disease as compared to the reference group (children with <5% of liver fat). \*P-value <0.01, †P-value <0.05. Confounder model adjusted for child's age, sex, ethnicity, maternal pre-pregnancy BMI and maternal education. BMI model: confounder model additionally adjusted for child BMI at 10 years. Visceral fat model: confounder model additionally adjusted for visceral fat mass at 10 years. HOMA-IR, Homeostatic Model Assessment of Insulin Resistance; n, number; SDS, standard deviation scores.

**Table 5.** Associations of Liver Fat Fraction with Odds of Clustering of Cardio-metabolic Risk Factors without Visceral Fat Mass – Confounder Models

| <b>Liver Fat Fraction (%)</b> | <b>Clustering of Cardio-metabolic Risk Factors without taking into account Visceral Fat Mass (n = 3,170)</b> |
|-------------------------------|--------------------------------------------------------------------------------------------------------------|
| < 2.0                         | <i>Reference group</i>                                                                                       |
| 2.0 – 2.9                     | 1.36 (1.08;1.71)*                                                                                            |
| 3.0 – 3.9                     | 2.85 (1.94;4.20)*                                                                                            |
| 4.0 – 4.9                     | 2.78 (1.50;5.14)*                                                                                            |
| ≥ 5.0                         | 6.68 (3.48;12.81)*                                                                                           |

Values are odds ratios (95% Confidence Intervals) analyzed in a subgroup of complete cases (n = 1,906) that reflect the odds of cardio-metabolic clustering without taking into account visceral fat mass, defined as having two or more out of high (>75<sup>th</sup> percentile) systolic or diastolic blood pressure, low (<25<sup>th</sup> percentile) HDL-cholesterol or high (>75<sup>th</sup> percentile) triglycerides, and high (>75<sup>th</sup> percentile) insulin for children with increasing liver fat fraction compared to the reference group (children with <2% of liver fat). \*P-value <0.01. Associations are adjusted for child age, sex, ethnicity, maternal pre-pregnancy BMI and maternal education. N, number.

**Figure 1.** Study Participants Flow Chart

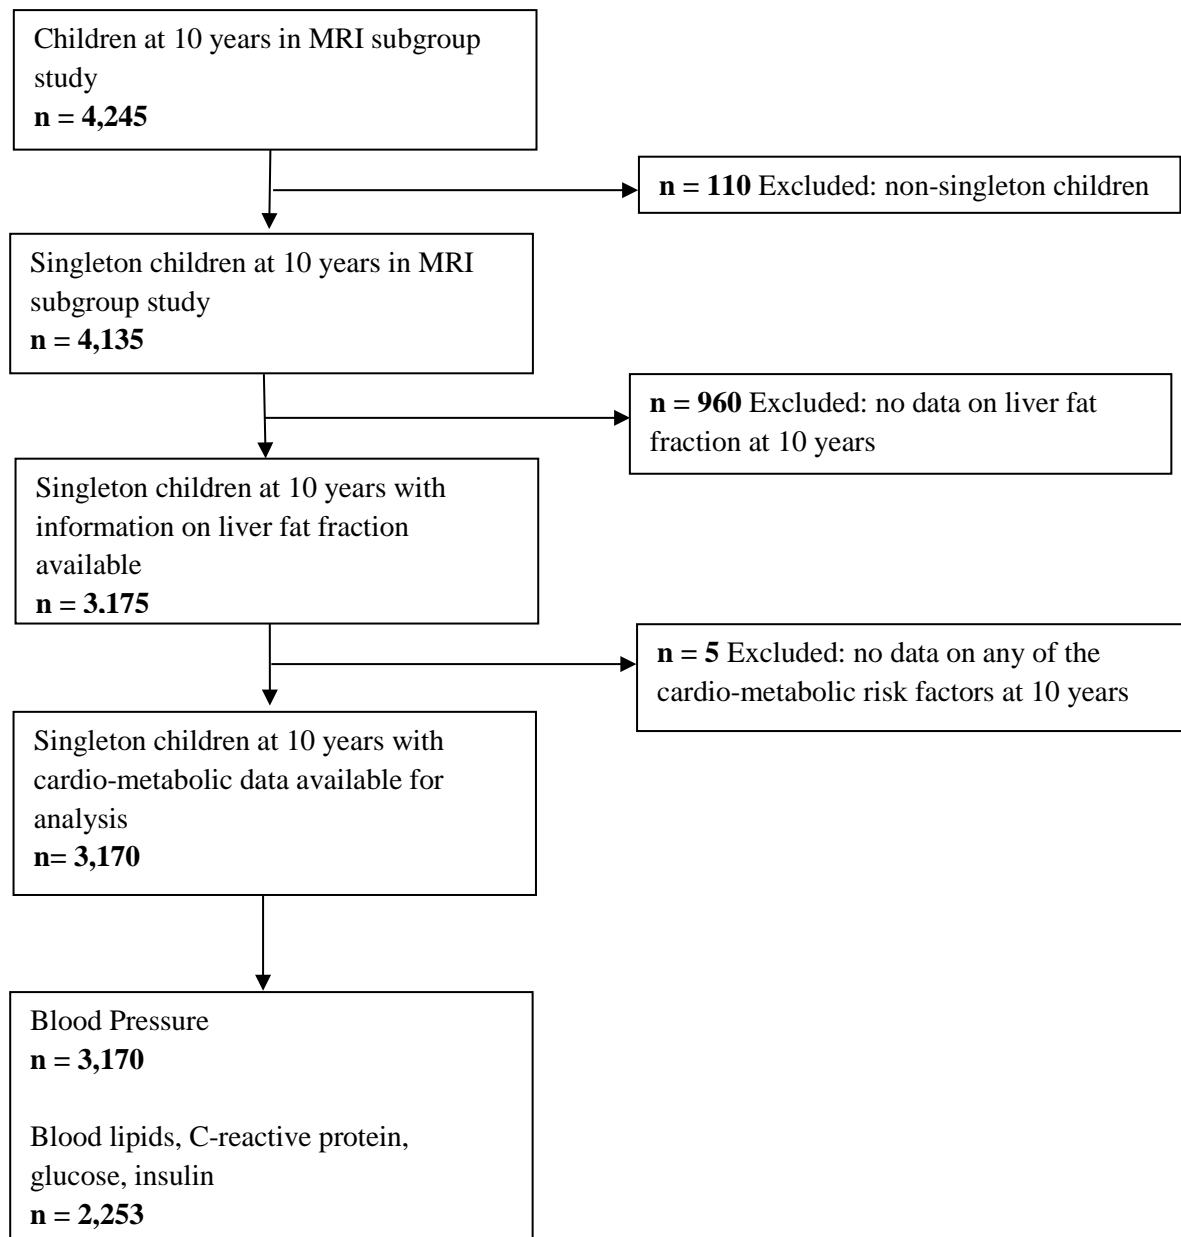



**Figure 2.** Associations of Liver Fat Fraction and Non-alcoholic Fatty Liver Disease with Cardio-metabolic Risk Factors at School Age – Basic Models

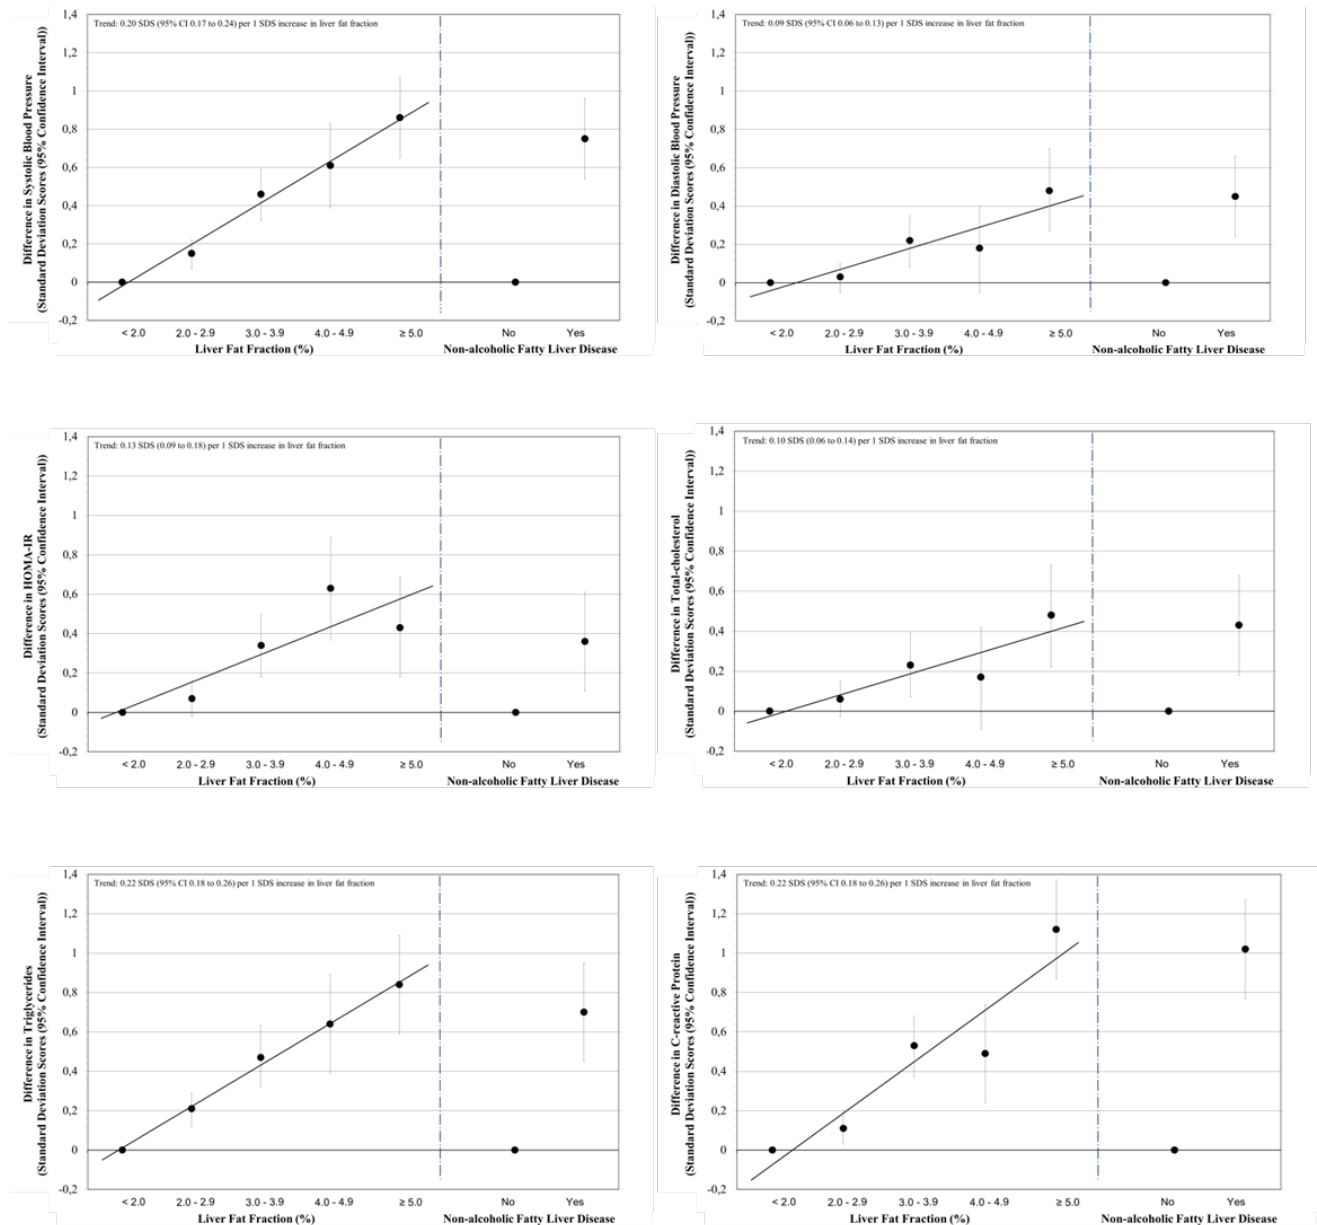

Values are regression coefficients (95% Confidence Intervals) from linear regression models that reflect differences in childhood cardio-metabolic risk factors in SDS per SDS change in childhood liver fat fraction as compared to the reference group (children with <2.0% of liver fat; left side of each figure), or for children with non-alcoholic fatty liver disease as compared to the reference group (children with <5% of liver fat; right side of each figure). Associations are adjusted for child age, sex, ethnicity. HOMA-IR, Homeostatic Model Assessment of Insulin Resistance; SDS, standard deviation scores. Trend lines are given only when p-value for linear trend <0.05.

**Figure 3.** Associations of Liver Fat Fraction and Non-alcoholic Fatty Liver Disease with Cardio-metabolic Risk Factors at School Age – Body Mass Index Models

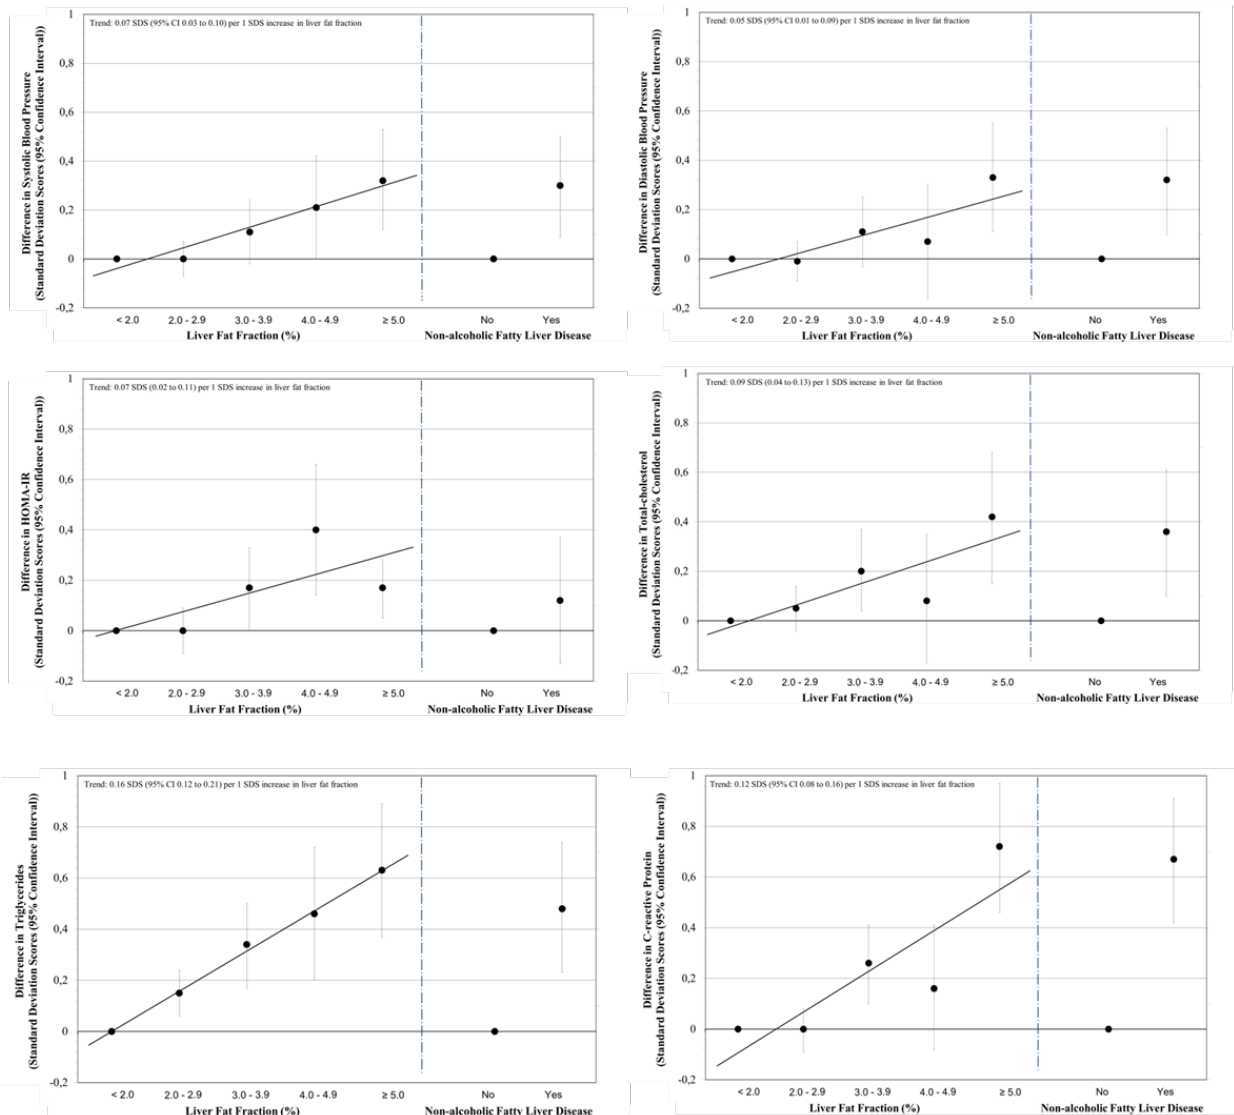

Values are regression coefficients (95% Confidence Intervals) from linear regression models that reflect differences in childhood cardio-metabolic risk factors in SDS per SDS change in childhood liver fat fraction as compared to the reference group (children with <2.0% of liver fat; left side of each figure), or for children with non-alcoholic fatty liver disease as compared to the reference group (children with <5% of liver fat; right side of each figure). Associations are adjusted for child age, sex, ethnicity, maternal pre-pregnancy BMI, maternal education and childhood BMI at ten years of age. HOMA-IR, Homeostatic Model Assessment of Insulin Resistance; SDS, standard deviation scores. Trend lines are given only when p-value for linear trend <0.05.

**Figure 4.** Histogram of Liver Fat Continuously of Children with Cardio-metabolic Clustering

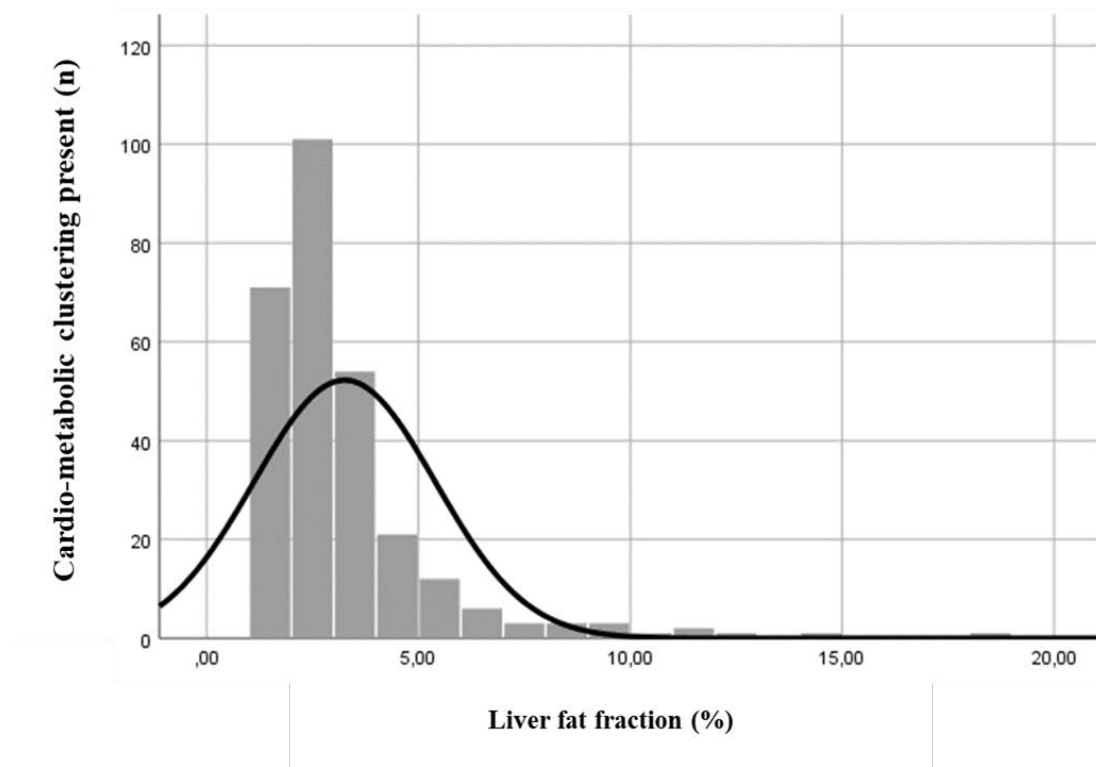

Histogram of liver fat continuously(%) for children with cardio-metabolic clustering present.

**Figure 5.** Histogram of Liver Fat Continuously of Children without Cardio-metabolic Clustering

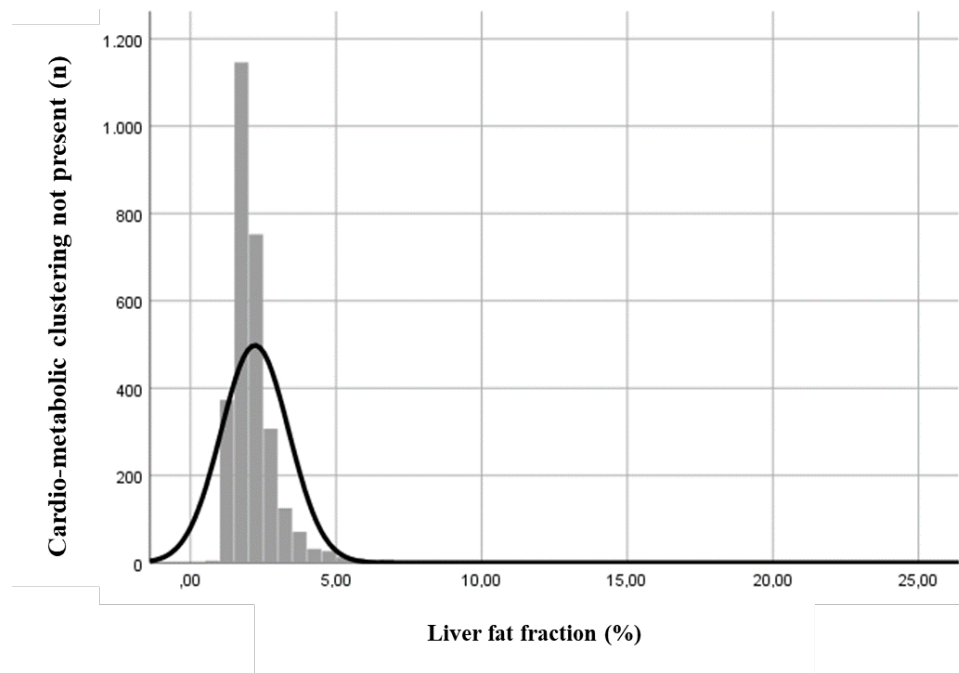

Histogram of liver fat continuously(%) for children without cardio-metabolic clustering present.

**Figure 6.** Associations of Liver Fat Fraction and Non-alcoholic Fatty Liver Disease with Odds of Adverse Levels of Single and Clustered Cardio-metabolic Risk Factors at School Age – Basic Models

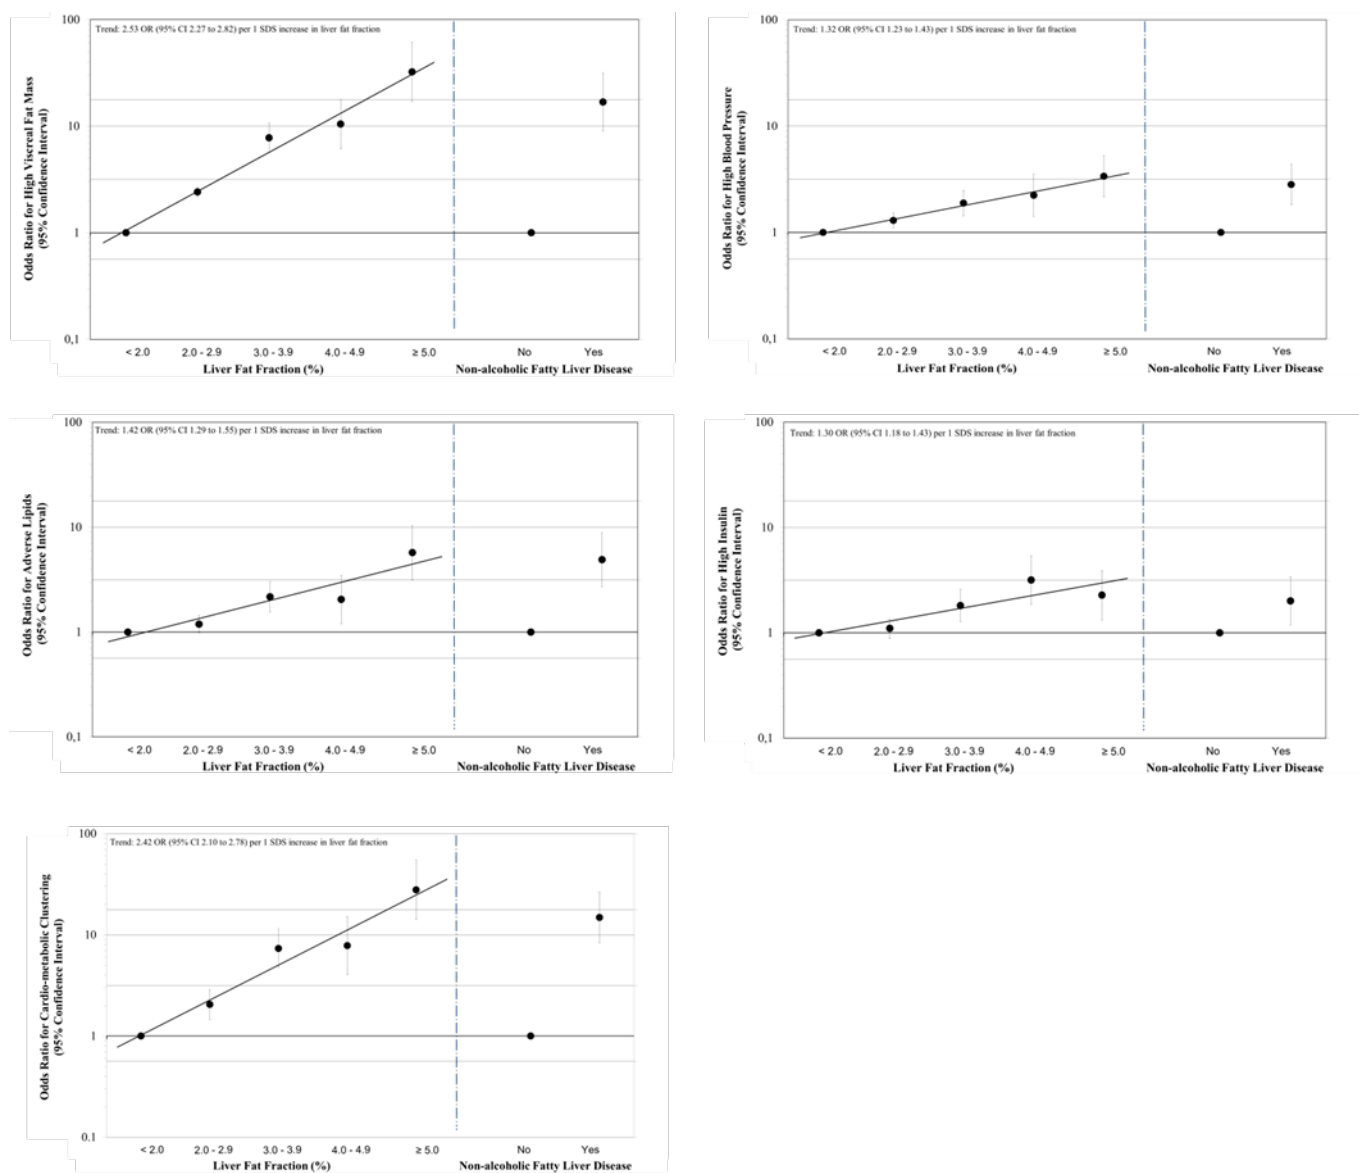

Values are odds ratios (95% Confidence Intervals) that reflect the risk of high (>75<sup>th</sup> percentile) visceral fat mass, high (>75<sup>th</sup> percentile) systolic or diastolic blood pressure, low (<25<sup>th</sup> percentile) HDL-cholesterol or high (>75<sup>th</sup> percentile) triglycerides, and high (>75<sup>th</sup> percentile) insulin and of cardio-metabolic clustering per SDS increase in liver fat fraction as compared to the reference group (<2.0%; left side of each figure), or for children with non-alcoholic fatty liver disease as compared to the reference group (children with <5% of liver fat; right side of each figure). Cardio-metabolic clustering was defined as having three or more of these risk factors and was analyzed in a subgroup of cases with complete data for all cardio-metabolic variables (n = 1,906). Associations are adjusted for child age, sex, ethnicity. OR, Odds Ratio; SDS, standard deviation scores. Trend lines are given only when p-value for linear trend <0.05.

**Figure 7.** Associations of Liver Fat Fraction and Non-alcoholic Fatty Liver Disease with Odds of Cardio-metabolic Risk Factors at School Age – Confounder Models

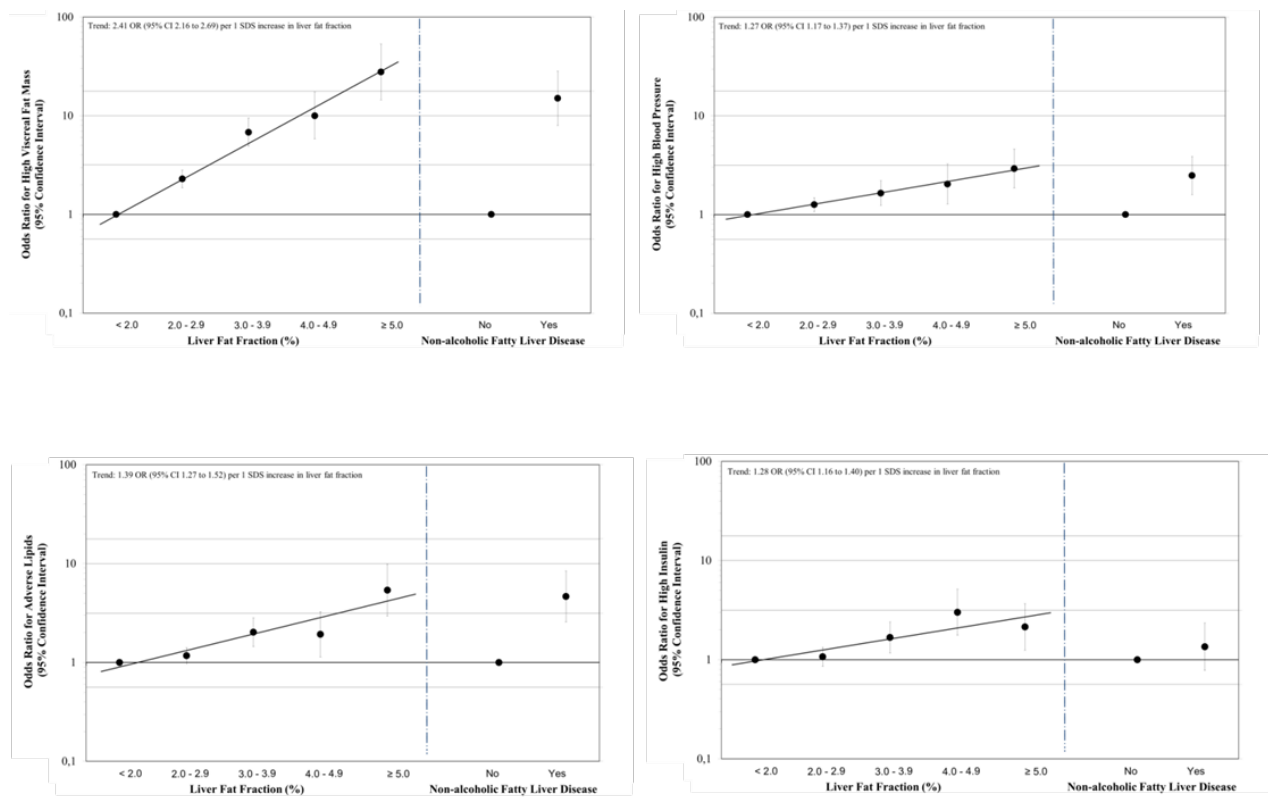

Values are odds ratios (95% Confidence Intervals) that reflect the risk of high (>75<sup>th</sup> percentile) visceral fat mass, high (>75<sup>th</sup> percentile) systolic or diastolic blood pressure (shown as high blood pressure), low (<25<sup>th</sup> percentile) HDL-cholesterol or high (>75<sup>th</sup> percentile) triglycerides (shown as adverse lipids), and high (>75<sup>th</sup> percentile) insulin per increase in liver fat fraction as compared to the reference group (<2.0%; left side of each figure), or for children with non-alcoholic fatty liver disease as compared to the reference group (children with <5% of liver fat; right side of each figure). Associations are adjusted for child age, sex, ethnicity, maternal pre-pregnancy BMI and maternal education. SDS, standard deviation scores. Trend lines are given only when p-value for linear trend <0.05.

**Figure 8.** Associations of Liver Fat Fraction and Non-alcoholic Fatty Liver Disease with Odds of Adverse Levels of Single and Clustered Cardio-metabolic Risk Factors at School Age – Body Mass Index Models

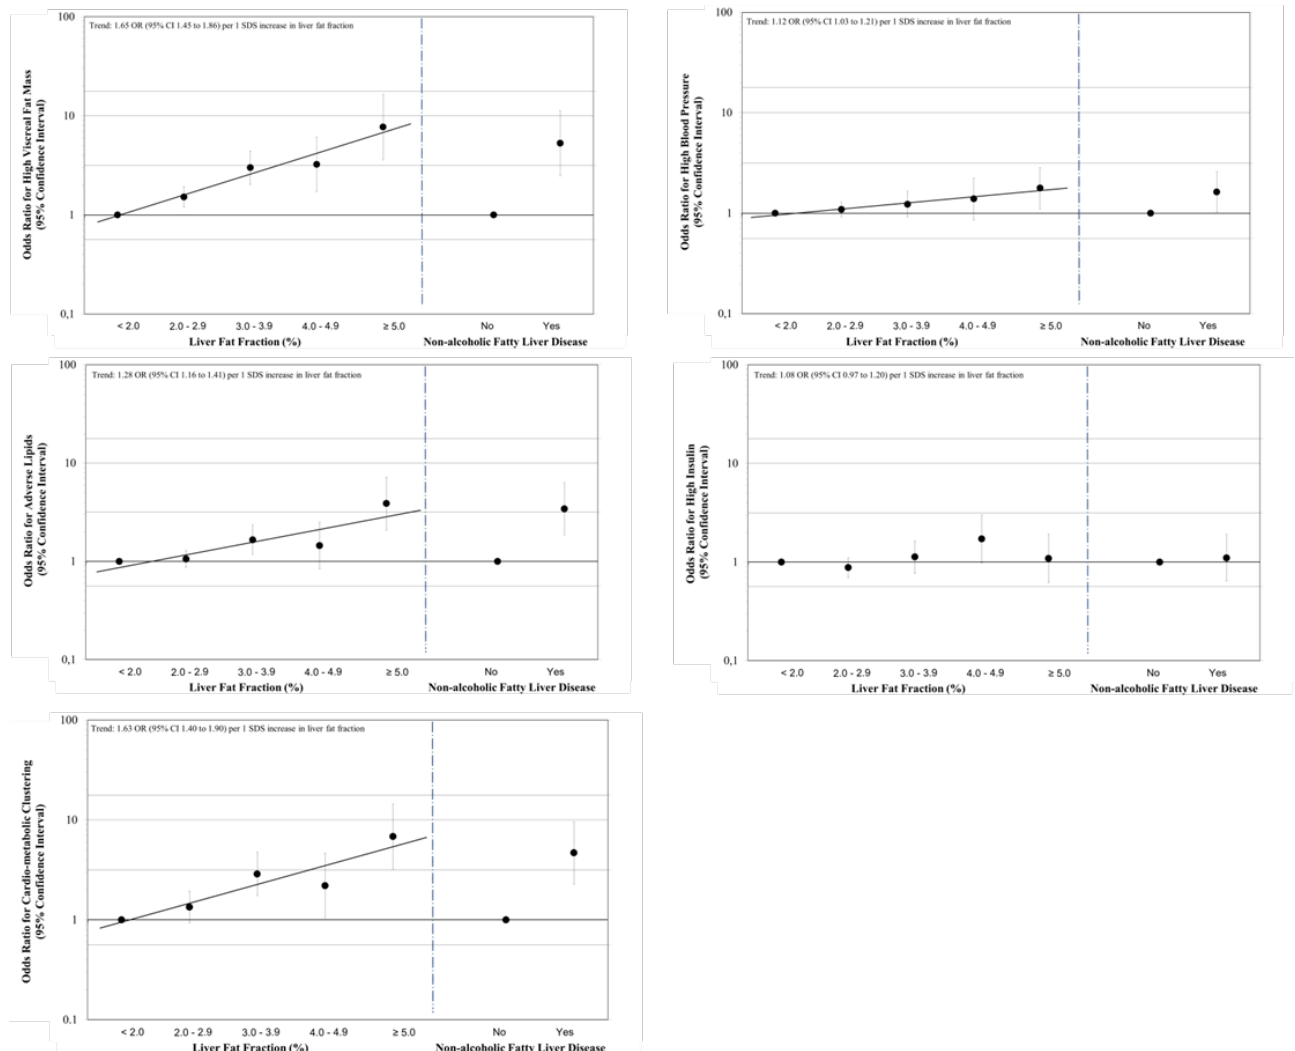

Values are odds ratios (95% Confidence Intervals) that reflect the risk of high (>75<sup>th</sup> percentile) visceral fat mass, high (>75<sup>th</sup> percentile) systolic or diastolic blood pressure (shown as high blood pressure), low (<25<sup>th</sup> percentile) HDL-cholesterol or high (>75<sup>th</sup> percentile) triglycerides (shown as adverse lipids), and high (>75<sup>th</sup> percentile) insulin and of cardio-metabolic clustering per increase in liver fat fraction as compared to the reference group (<2.0%; left side of each figure), or for children with non-alcoholic fatty liver disease as compared to the reference group (children with <5% of liver fat; right side of the figure). Cardio-metabolic clustering was defined as having three or more of these risk factors and was analyzed in a subgroup of cases with complete data for all cardio-metabolic variables (n = 1,906). Associations are adjusted for child age, sex, ethnicity in the basic models, further adjusted for maternal pre-pregnancy BMI and maternal education in the confounder models and additionally adjusted for childhood BMI at ten years of age in the BMI model. OR, Odds Ratio; SDS, standard deviation scores. Trend lines are given only when p-value for linear trend <0.05.
